# Supplementary material
Source: Springer Nature journal article supplement (https://www.springermedizin.de/resource/supplementary/13013_2009_305_MOESM13_ESM.pdf/9631610)
Supplement: MOESM13 [file 9631610]

| A1                                                                                                                                                                                                                                                                                                    | A2                                                                                                                                                                                                                                                                       | A3                                                                                                                                                                                                                                                                                                                   |
|-------------------------------------------------------------------------------------------------------------------------------------------------------------------------------------------------------------------------------------------------------------------------------------------------------|--------------------------------------------------------------------------------------------------------------------------------------------------------------------------------------------------------------------------------------------------------------------------|----------------------------------------------------------------------------------------------------------------------------------------------------------------------------------------------------------------------------------------------------------------------------------------------------------------------|
| <p><b>Clinical Criteria</b></p> <ul style="list-style-type: none"> <li>● Pelvis translated to the concave thoracic side</li> <li>● Trunk Imbalance to the convex thoracic side</li> <li>● Long thoracic rib hump going down into the lumbar region</li> </ul>                                         | <p><b>Clinical Criteria</b></p> <ul style="list-style-type: none"> <li>● Pelvis translated to the concave thoracic side</li> <li>● Trunk Imbalance to the convex thoracic side</li> <li>● Noticeable Rib hump / No lumbar or Minimal Lumbar Prominence</li> </ul>        | <p><b>Clinical Criteria</b></p> <ul style="list-style-type: none"> <li>● Pelvis translated to the concave thoracic side</li> <li>● Trunk Imbalance to the convex thoracic side</li> <li>● Noticeable Rib Hump / Minor Lumbar Prominence</li> </ul>                                                                   |
| <p><b>Radiological Criteria</b></p> <ul style="list-style-type: none"> <li>● Single Long Thoracic/Fractioned Lumbar</li> <li>● TP imbalance to the convex thoracic side</li> <li>● T1 imbalance to the convex thoracic side</li> <li>● L4 horizontal or tilted to the convex thoracic side</li> </ul> | <p><b>Radiological Criteria</b></p> <ul style="list-style-type: none"> <li>● Single Thoracic/No or Minimal Functional Lumbar</li> <li>● TP imbalance to the convex thoracic side</li> <li>● T1 imbalance to the convex thoracic side</li> <li>● L4 horizontal</li> </ul> | <p><b>Radiological Criteria</b></p> <ul style="list-style-type: none"> <li>● Single Major Thoracic/Lumbar Minor</li> <li>● TP imbalance to the convex thoracic side</li> <li>● T1 imbalance to the convex thoracic side</li> <li>● L4 tilted to the concave thoracic side / Negative L5-4 Counter-Tilting</li> </ul> |

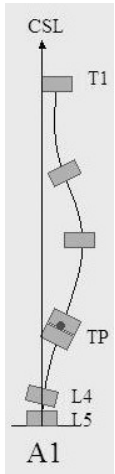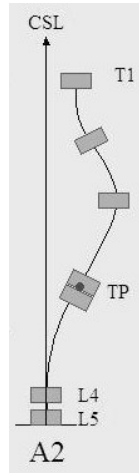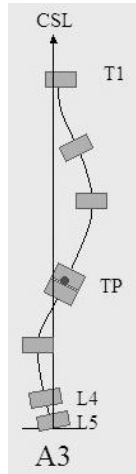

|                                                                                                                                                                                                                |                                                                                                                                                                                   |                                                                                                                                                                                    |
|----------------------------------------------------------------------------------------------------------------------------------------------------------------------------------------------------------------|-----------------------------------------------------------------------------------------------------------------------------------------------------------------------------------|------------------------------------------------------------------------------------------------------------------------------------------------------------------------------------|
| <p><b>Brace Design</b></p> <ul style="list-style-type: none"> <li>● 3C 'Open Pelvis on the Convex Thoracic Side'</li> </ul> 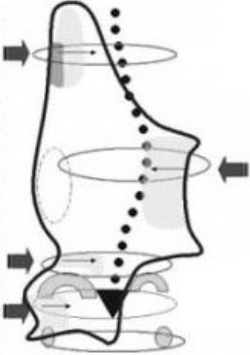 | <p><b>Brace Design</b></p> <ul style="list-style-type: none"> <li>● 3C 'Classical'</li> </ul>  | <p><b>Brace Design</b></p> <ul style="list-style-type: none"> <li>● 3C 'Classical'</li> </ul>  |
|----------------------------------------------------------------------------------------------------------------------------------------------------------------------------------------------------------------|-----------------------------------------------------------------------------------------------------------------------------------------------------------------------------------|------------------------------------------------------------------------------------------------------------------------------------------------------------------------------------|
